# Supplementary material
Source: PubMed Central journal article supplement (PMC3307798)
Supplement: NIHMS350931-supplement-1_si_001.pdf [file NIHMS350931-supplement-1_si_001.pdf]

## **Supporting Information**

Environmental Science and Technology  
November 17, 2011

MANUSCRIPT TITLE: Field, Experimental, and Modeling Study of Arsenic  
Partitioning across a Redox Transition in a Bangladesh Aquifer

AUTHOR NAMES: Hun Bok Jung<sup>1,#</sup>, Benjamin C. Bostick<sup>2</sup>, and Yan Zheng<sup>1,2\*</sup>

### AUTHOR ADDRESSES:

<sup>1</sup>School of Earth and Environmental Sciences, Queens College, and Graduate School and  
University Center of the City University of New York, Flushing, NY 11367 United States

<sup>2</sup>Lamont-Doherty Earth Observatory of Columbia University, Palisades, NY 10964  
United States

#Present address for Hun Bok Jung: Pacific Northwest National Laboratory, Richland  
WA 99354, USA

NUMBER OF PAGES: 21

NUMBER OF TABLES: 7

NUMBER OF FIGURES: 4

### ***Sampling method for sediment core, porewater, groundwater and river water***

Riverbank sediment and porewater samples for sorption and desorption experiments were collected in Jan. 2006 and Nov. 2007 at sandy beaches within ~30 m from the shore of the Meghna River in Gazaria, Bangladesh. Sediment core samples were obtained by a soil probe (AMS Inc., USA), consisting of a probe (1.9 cm diameter and 30.5 cm length), extension rods (60 cm each section), and a slide hammer. Before collecting a sediment core sample at any depth, a drill hole was deepened with a 5 cm diameter PVC pipe by the so-called “hand-flapper” method used by local driller (Horneman et al, 2004). Then the soil probe with liner connected to the extension rods was inserted in the PVC pipe and hammered into the sediment. After the probe was raised, the plastic liner was capped, and immediately placed into an N<sub>2</sub> flushed anaerobic glove box on site for sorption experiment. Other sediment samples were stored in a Mylar bag with oxygen absorbers (SorbentSystems) flushed with nitrogen and kept on ice. Sediment samples from RS19-4 were stored at 4 °C in double sealed Mylar bag flushed with N<sub>2</sub> until the desorption experiment 11 months later.

Three riverbank porewater samples from 1.5, 3.6 and 5.4 m depth at PZ10, corresponding to the same depth as the sediment core samples from RS39, were used in batch sorption experiment. The porewater samples were obtained using a stainless steel drive point piezometer system (“Retract-A-Tip”, AMS Inc) (Charette and Allen 2005). Porewater samples were drawn to the surface through acid-cleansed nylon tubing using a peristaltic pump at a flow rate of 500 ml min<sup>-1</sup>. After stabilization of the reading of the oxidation reduction potential (ORP), pH, dissolved oxygen, and temperature that were measured using a YSI 600XLM in a flow through cell (YSI Inc), samples filtered through

an inline 0.45  $\mu\text{m}$  Pall AquaPrep 600 filter were collected into 250 mL serum bottles (Wheaton Science) and crimp sealed. Other aliquots of porewater samples were collected in acid-cleaned high-density polyethylene (HDPE) liquid scintillation vials (Wheaton Science) for chemical analysis. Arsenic speciation cartridge packed with 2.5 g of aluminosilicate adsorbent (Meng et al., 2001) was used to separate As(III) from As(V) in the field. Groundwater samples were collected from shallow tube wells in villages nearby the riverbank sampling sites after pumping continuously for 15-30 min until the temperature, conductivity, pH and ORP reading monitored by a HORIBA multiprobe (U22XD) had stabilized. Samples were not filtered but acidified to 1% HCl (Fisher Optima) for cation analysis, while not acidified for anion analysis. River water samples were collected in 20 mL scintillation vials on boat after filtration through a 0.45  $\mu\text{m}$  membrane filter, and acidified to 1% HCl (Fisher Optima). Temperature, pH, conductivity, and ORP were measured using a HORIBA or YSI multiprobe.

### ***Water Analysis***

Concentrations of dissolved Fe, Mn, S, P, and As in filtered and acidified porewater and supernatant samples after sorption and desorption experiments were analyzed by high resolution inductively coupled plasma mass spectrometry (HR ICP-MS) on an Axiom (Thermo Elemental, Germany) (Cheng et al., 2004). For quality assurance, one or more laboratory control samples (LDEO) or NIST 1643E were included with each run, resulting in error within 5 to 10%. Anions (F, Cl,  $\text{NO}_3$ ,  $\text{PO}_4$ ,  $\text{SO}_4$ ) in filtered but not acidified samples of supernatant of sediment slurry and porewater were measured by Ion Chromatography (Dionex DX500), following a standard EPA protocol. Immediately after

sampling, the concentrations of As(III) and Fe(II) in the supernatant were determined by differential pulse cathodic stripping voltammetry (DPCSV) on an Eco-Chemie  $\mu$ autolab with a Metrohm 663A stand, by Brinkmann Instrument (He et al., 2004) and ferrozine colorimetric method (Stookey, 1970) on a HACH DR2010 photospectrometer, respectively.

In desorption experiment (Table S7), dissolved Fe(II) concentration determined by ferrozine colorimetric method was higher than dissolved total Fe concentration determined by ICP-MS usually for samples with total Fe concentration between 0.1 to 0.2 mg/L. Although the colorimetric method used to determine Fe(II) can be as sensitive as 0.02 mg/L (Viollier et al., 2000), we could only quantify it at 0.1 mg/L or above due to sometimes high blank corrections. Hence for these samples with Fe(II) concentration at close to quantification limit, results are not very accurate. In both adsorption (Table S4) and desorption (Table S7) experiments, As(III) concentration was significantly higher than total As (> 10%) when As concentration is higher than  $\sim 3000$   $\mu$ g/L (2 of 22 samples in adsorption experiment and 3 of 20 samples in desorption experiment) because such high As concentration required dilution by a factor of more than 100 to lower the As concentration to below 50  $\mu$ g/L, which is the optimum range of As concentration for DPCSV analysis, and consequently analytical errors appeared to take place during the dilution process. Additionally, high concentration of dissolved substances such as Fe and Mn or organic matter in supernatant could have affected the analytical accuracy of DPCSV measurement due to interference with As (III) (Gibbon-Walsh et al., 2011), affecting the calibration curve by standard addition.

### ***Sediment Analysis***

Sediment HCl-leachable Fe(II) and total Fe were analyzed in the field, and the concentrations of Fe, Mn, S, P, and As in the HCl leachate were also quantified. Within hours of sample collection, samples were leached with 10 mL of 1.2N HCl in 15 mL centrifuge tube (BD Falcon) at 80 °C for 1hr to liberate elements associated with amorphous and labile crystalline Fe oxyhydroxides phases (Horneman et al, 2004). Total Fe and Fe(II) in the leachates were determined by a colorimetric technique using ferrozine solution in the field (Stookey, 1970; Horneman et al., 2004). The sediment HCl leachates were also analyzed by HR ICP-MS for Fe, Mn, S, P, and As. To evaluate sorbed sediment As, 1M sodium phosphate ( $\text{NaH}_2\text{PO}_4$ ) solution with 0.1M L-ascorbic acid was adjusted to pH 5 using NaOH pellets and purged with nitrogen. The solution was then added to serum bottles containing sediment, again crimp sealed with rubber stopper and aluminum cap under pure  $\text{N}_2$  condition. Samples were shaken for 36 hours and then filtered through a 0.2  $\mu\text{m}$  membrane syringe filter (Jung and Zheng, 2006). Concentrations of As(III) in the phosphate extract were determined by DPCSV in the field. Total As concentrations in phosphate extracts were determined by HR ICP-MS in the laboratory. All solid phase concentrations were reported on dry weight basis after the correction of average moisture content of about 10% measured on these samples.

### ***X-ray Absorption Spectroscopy***

Samples were prepared by mounting a small quantity of the solids on Whatman filter paper, saturating the paste with a small quantity of glycerol to prevent oxidation prior to and during measurement, and then sealing the filtrate in Teflon sample holders with

Kapton® film. All samples were prepared in the glove box then transferred in anaerobic containers with gasket seals to a lab freezer until analysis.

At the Stanford Synchrotron Radiation Laboratory, samples were analyzed on either beamline 10-2 or 11-2 using an unfocused beam and a Si(200) crystal monochromator. Data were collected in fluorescence mode using either a 13-element (beamline 2-3) or 30 element (beamline 11-2) Ge detector. EXAFS spectra were collected from -235 to 875 eV about the Fe K edge (defined as 7112.0 eV for the maximum in the first derivative spectrum of an iron metal foil). XANES spectra were collected from -235 to 425 eV about the As K edge (defined as 11874.0 eV for a calcium arsenate standard).

Linear combination fitting were done with SIXPack software (Webb, 2005). Final fitting of As spectra used three spectra: arsenate and arsenite adsorbed on ferrihydrite as As(V) and As(III) standards (50 mg kg<sup>-1</sup> total As), and orpiment (As<sub>2</sub>S<sub>3</sub>) as a model arsenic(III) sulfide. Linear combination fitting of Fe K-edge EXAFS spectra used k<sup>3</sup>-weighted chi functions. For Fe EXAFS analysis, k<sup>3</sup>-weighted EXAFS spectra of sediments were compared to a spectral library of commonly encountered reference compounds to identify the major iron minerals present in the sample suite. The fraction concentration of each Fe phase was then determined by linear combination fitting of Fe spectra with the spectra of their mineral components. Final fits included hematite (Fe<sub>2</sub>O<sub>3</sub>), ferrihydrite (Fe(OH)<sub>3</sub>), crystalline goethite (α-FeOOH), siderite (FeCO<sub>3</sub>), mackinawite (nominally FeS), and biotite (KFe<sub>3</sub>(Si<sub>3</sub>Al)O<sub>10</sub>(OH)<sub>2</sub>, representative of Fe(II) silicates) as spectral components. Because of similar XANES and EXAFS spectra, siderite standard represents a variety of Fe(II) phases such as Fe(II) phosphate, sulfate, carbonate, and

some oxides that include a wide variety of oxygen-bound Fe(II) that is in tetrahedral coordination.

The goethite chosen as a reference spectrum is crystalline and has XAS spectra easily distinguished from ferrihydrite. Other reference spectra were also considered (including magnetite ( $\text{Fe}_3\text{O}_4$ ), pyrite ( $\text{FeS}_2$ ), lepidocrosite ( $\gamma\text{-FeOOH}$ ), green rust, and hornblende), and chlorite (representative of model Fe(III) silicates) but were not included because they were consistently negligible in fits or were not easily differentiated from other model phases. Errors calculated using SixPack include error from fitting, from reference spectrum quality and orthogonality (how unique they are from each other). In each case, calculated errors were  $<7\%$  for all minerals except ferrihydrite, in part because of the spectral similarity between goethite and ferrihydrite. These errors are in line with those typical of linear combination fitting in other studies ( $\sim 7\%$ ) based on fitting statistics and fits of known mixtures of As and Fe minerals (O'Day et al., 2004).

### ***Fe EXAFS vs. Chemical Extraction***

The sum of Fe(III) oxyhydroxides (e.g. ferrihydrite, goethite, and hematite) percentage determined by XAS, excluding a sample with HCl leachable Fe(III)/Fe of 0.74 and Fe(III) concentration of  $7715 \text{ mg kg}^{-1}$  shows a good correlation with HCl leachable Fe(III) concentration ( $R^2=0.63$ ;  $n=8$ ) or Fe(III)/Fe ratio ( $R^2=0.78$ ;  $n=8$ ) (Fig. S3), suggesting that HCl leachable Fe(III) concentration or Fe(III)/Fe ratio reflects the relative abundance of Fe(III) oxyhydroxides, and that the fraction of oxides determined by XAS is a reasonable representation of what is found in the sediments.

### ***Sediment Arsenic Speciation***

Anaerobic P-extraction of As enriched sediment ( $> \sim 50 \text{ mg kg}^{-1}$ ;  $n=3$ ) found that As(III) is dominant in RS19 (7 m from shore) with 71% and 90% As(III), but As(V) is dominant in RS21 (14 m from shore) with 89% As(V) (Fig. 1). XANES spectra also reveal that both arsenite and arsenate are present in variable proportions ( $43 \pm 20\%$  As(III) and  $56 \pm 20\%$  As(V);  $n=9$ ) usually with higher proportion as As(III) when the samples are collected from deeper depths (Fig. S2, Table S6). Sulfide phases are insignificant in all samples ( $1 \pm 2\%$ ,  $n=9$ ) (Table S6). Solid phase speciation indicates that there is higher proportion of As(V), either in total or extracted fractions, in sediments than in porewaters. This may reflect the preferential adsorption of As(V) from solution or preferential reduction to mobilize sorbed As(V) (essentially a difference in the effective  $K_d$ ), or the oxidation and retention of adsorbed As(III).

In sorption experiment, the higher P-extractable As(III) than P-extractable total As (Table S2) is most likely attributed to change of As concentration during sample storage. P-extractable As(III) was determined by DPCSV in the field immediately after extraction, while P-extractable total As was analyzed by ICP-MS a few weeks later. Higher As(III) than total As in P-extraction may be attributed to precipitation of Fe-As-Phosphate in P-extraction samples that are not-acidified during sample storage.

### **References**



- Charette, M. A. and Allen, M. C., 2006. Precision ground water sampling in coastal aquifers using a direct-push, shielded-screen well-point system. *Ground Water Monit. Remediat.* 26, 87-93.
- Cheng, Z., Zheng, Y., Mortlock, R., and van Geen, A., 2004. Rapid multi-element analysis of groundwater by high-resolution inductively coupled plasma mass spectrometry. *Analytical and Bioanalytical Chemistry* 379, 512-518.
- Dzombak, D.A.; Morel, F.M.M. *Surface Complexation Modeling: Hydrous Ferric Oxide*. Wiley-Interscience: New York, 1990.
- Gibbon-Walsh, K.; Salaun, P.; Uroic, M. K.; Feldmann, J.; McArthur, J. M. Voltammetric determination of arsenic in high iron and manganese groundwaters. *Talanta* 85, 1404-1411.
- He, Y., Zheng, Y., Ramnaraine, M., and Locke, D. C., 2004. Differential pulse cathodic stripping voltammetric speciation of trace level inorganic arsenic compounds in natural water samples. *Ana. Chim. Acta* 511, 55-61.
- Horneman, A., Van Geen, A., Kent, D. V., Mathe, P. E., Zheng, Y., Dhar, R. K., O'Connell, S., Hoque, M. A., Aziz, Z., Shamsudduha, M., Seddique, A. A., and Ahmed, K. M., 2004. Decoupling of As and Fe release to Bangladesh groundwater under reducing conditions. Part 1: Evidence from sediment profiles. *Geochim. Cosmochim. Acta* 68, 3459-3473.
- Jung, H. B. and Zheng, Y., 2006. Enhanced recovery of arsenite sorbed onto synthetic oxides by L-ascorbic acid addition to phosphate solution: calibrating a sequential leaching method for the speciation analysis of arsenic in natural samples. *Wat. Res.* 40, 2168-2180.

- Meng X. G., Korfiatis G. P., Jing C. Y. and Christodoulatos C., Redox transformations of arsenic and iron in water treatment sludge during aging and tclp extraction. 2001. Environ. Sci. Technol. 35, 3476-3481.
- O'Day P. A., Rivera N.; Root R., Carroll S. A. X-ray absorption spectroscopic study of Fe reference compounds for the analysis of natural sediments. Am. Miner. 2004, 89, 572-585.
- Stookey, L. L., 1970. Ferrozine – A new spectrophotometric reagent for iron. Anal. Chem. 42, 779-781.
- Viollier, E., Inglett, P.W., Hunter, K., Roychoudhury, A.N., and Van Cappellen, P. The ferrozine method revisited: Fe(II)/Fe(III) determination in natural waters. Appl. Geochem. 2000, 15(6), 785-790.
- Webb S. M. SIXpack: a graphical user interface for XAS analysis using IFEFFIT. Phys. Scr. T115, 1011-1014, 2005.

Table S1. Summary of the average chemical composition of groundwater, riverbank porewater, and river water collected during Jan. 2006 and Nov. 2007.

| Sample type         | Sampling Date | Number of sample | Depth m | EC    | DO   | pH   | Na   | K   | Ca    | Mg   | Si   | HCO <sub>3</sub> | SO <sub>4</sub> | Cl   | NO <sub>3</sub> | NO <sub>2</sub> | Fe    | Mn   | S    | As  | P    |
|---------------------|---------------|------------------|---------|-------|------|------|------|-----|-------|------|------|------------------|-----------------|------|-----------------|-----------------|-------|------|------|-----|------|
|                     |               |                  |         | mS/cm | mg/L |      |      |     |       |      |      |                  |                 |      |                 |                 |       |      |      |     |      |
| Well groundwater    | Jan 2006      | 11               | 14~21   |       |      |      | 8.4  | 3.4 | 71.2  | 10.5 | 20.3 |                  |                 |      |                 |                 | 8.75  | 1.53 | 0.61 | 238 | 1875 |
|                     | Nov 2007      | 11               | 15~23   | 0.569 | 0.05 | 6.87 | 14.2 | 3.1 | 98.2  | 20.2 | 18.6 | 269.2            | 0.9             | 58.4 | 0.00            | 0.13            | 9.77  | 1.79 | 1.67 | 385 | 1258 |
| Riverbank porewater | Jan 2006      | 1                | 0~2     |       |      |      | 3.9  | 1.4 | 15.8  | 4.7  | 10.2 |                  |                 |      |                 |                 | 1.02  | 0.34 | 4.93 | 1   | 15   |
|                     |               | 5                | 2~5     |       |      |      | 3.9  | 2.1 | 107.1 | 16.3 | 24.4 |                  |                 |      |                 |                 | 5.46  | 3.54 | 0.89 | 99  | 420  |
|                     |               | 5                | 5~7     |       |      |      | 4.4  | 1.9 | 80.1  | 12.5 | 23.8 |                  |                 |      |                 |                 | 1.72  | 2.84 | 0.29 | 90  | 436  |
|                     | Nov 2007      | 8                | 0~2     | 0.228 | 0.29 | 6.19 | 4.4  | 1.5 | 17.2  | 6.8  | 8.9  | 49.0             | 12.4            | 8.9  | 0.00            | 0.28            | 0.13  | 0.58 | 5.89 | 1   | 25   |
|                     |               | 18               | 2~5     | 0.482 | 0.12 | 6.55 | 4.1  | 1.9 | 60.0  | 15.3 | 22.7 | 194.6            | 2.6             | 4.5  | 0.00            | 0.09            | 11.57 | 3.84 | 1.26 | 118 | 760  |
|                     |               | 6                | 5~6     | 0.401 | 0.19 | 6.56 | 3.6  | 1.2 | 39.3  | 11.7 | 21.2 | 129.7            | 1.9             | 3.3  | 0.00            | 0.28            | 1.14  | 1.52 | 0.90 | 28  | 211  |
| River water         | Jan 2006      | 3                |         | 0.011 | 8.74 | 6.28 | 3.2  | 0.8 | 11.1  | 2.3  | 5.4  |                  |                 |      |                 |                 | 0.04  | 0.07 | 1.48 | 2   | 9    |
|                     | Nov 2007      | 6                |         | 0.062 | 5.51 | 6.96 | 1.9  | 0.5 | 3.5   | 0.9  | 3.9  | 8.8              | 2.3             | 1.2  | 1.08            | 0.07            | 0.18  | 0.01 | 0.93 | 2   | 6    |

Table S2. Characteristics of sediment and Langmuir isotherms from sorption experiment spiked with As(III) and As(V); Sand fraction is on average 94% for RS39; Porewater samples from PZ10 (23° 35.0' N, 90° 35.2' E) were used for the batch sorption experiment with sediment samples from RS39; PZ10 was collected simultaneously at the same depth as RS39 sediment core, both of which are in 1 m distance from each other along the shore.

| Sample ID | Depth (m) | Color | Characteristics of sediment |                   |                   |             |                  | Langmuir sorption model    |      |                   |       |                          |      |                   |       |
|-----------|-----------|-------|-----------------------------|-------------------|-------------------|-------------|------------------|----------------------------|------|-------------------|-------|--------------------------|------|-------------------|-------|
|           |           |       | 1.2N HCl leach FeIII/Fe     | 1.2N HCl leach Fe | 1.2N HCl leach As | 1M P-ext As | 1M P-ext As(III) | As(III) spiking experiment |      |                   |       | As(V) spiking experiment |      |                   |       |
|           |           |       |                             |                   |                   |             |                  | $K_{La}$                   | Kd   | Sorption capacity | $R^2$ | $K_{La}$                 | Kd   | Sorption capacity | $R^2$ |
|           |           |       | mg/kg                       | mg/kg             | mg/kg             | mg/kg       | mg/kg            | L/kg                       | L/kg | mg/kg             |       | L/kg                     | L/kg | mg/kg             |       |
| RS39-1    | 1.5       | Brown | 0.58                        | 4585              | 0.55              | -           | -                | 670900                     | 7.9  | 12.5              | 0.99  | 311111                   | 6.9  | 22.9              | 1.00  |
| RS39-4    | 3.6       | Grey  | 0.38                        | 3093              | 0.45              | 0.92        | 1.10             | 322738                     | 1.2  | 3.8               | 0.98  | 189250                   | 1.7  | 9.4               | 0.96  |
| RS39-6    | 5.4       | Grey  | 0.37                        | 3305              | 0.71              | 1.05        | 1.51             | 377070                     | 1.2  | 3.4               | 0.98  | 201205                   | 1.3  | 6.8               | 1.00  |

Table S3. The chemical composition of porewater samples from PZ10 (23° 35.0' N, 90° 35.2' E), located 1 m away from sediment core RS39. Porewater from PZ10 and sediment core RS39 collected simultaneously at the same depth were used for As(III) and As(V) batch sorption experiment.

| Piezometer | Sample ID | Depth<br>m | Temp<br>°C | EC<br>mS/cm | DO<br>mg/L | pH   | Na   | K   | Ca   | Mg   | Si   | HCO <sub>3</sub> | SO <sub>4</sub> | Cl    | Br   | F    | Sr   | NO <sub>3</sub> | NO <sub>2</sub> | Fe   | Mn   | S    | As   | P   |
|------------|-----------|------------|------------|-------------|------------|------|------|-----|------|------|------|------------------|-----------------|-------|------|------|------|-----------------|-----------------|------|------|------|------|-----|
|            |           |            |            |             |            |      | mg/L |     |      |      |      |                  |                 |       |      |      |      |                 |                 |      |      |      | µg/L |     |
| PZ10       | GBPW-44   | 1.5        | 29.3       | 0.220       | 0.30       | 5.97 | 4.3  | 1.3 | 11.5 | 3.7  | 9.4  | -                | 20.99           | 11.24 | 0.00 | 0.14 | 0.08 | < 0.1           | 0.44            | 0.55 | 0.41 | 6.61 | 1    | 28  |
|            | GBPW-45   | 3.6        | 29.0       | 0.872       | 0.20       | 6.15 | 3.4  | 2.1 | 64.0 | 18.8 | 24.3 | -                | 2.10            | 3.86  | 0.15 | 0.19 | 0.42 | < 0.1           | 0.45            | 2.52 | 3.02 | 0.88 | 28   | 292 |
|            | GBPW-46   | 5.4        | 28.1       | 0.524       | 0.20       | 6.52 | 2.4  | 1.2 | 38.8 | 11.9 | 24.7 | -                | 3.77            | 5.66  | 0.00 | 0.15 | 0.22 | < 0.1           | 0.45            | 1.16 | 1.37 | 1.35 | 58   | 554 |

Table S4. Batch equilibrium of As sorption to suboxic (RS39-1) and anoxic (RS39-4 and 39-6) sediments from Meghna Riverbank spiked with As(III) and As(V).

| Sample ID     | As(III) spiking experiment |                 |                     |                | As(V) spiking experiment |                 |                     |                |
|---------------|----------------------------|-----------------|---------------------|----------------|--------------------------|-----------------|---------------------|----------------|
|               | Added As                   | As in solution  | As(III) in solution | Sorbed As      | Added As                 | As in solution  | As(III) in solution | Sorbed As      |
|               | $\mu\text{g/L}$            | $\mu\text{g/L}$ | $\mu\text{g/L}$     | $\text{mg/kg}$ | $\mu\text{g/L}$          | $\mu\text{g/L}$ | $\mu\text{g/L}$     | $\text{mg/kg}$ |
| <b>RS39-1</b> | 0                          | 23              | 25                  | 0              | 0                        | 23              | 25                  | 0              |
|               | 850                        | 201             | 189                 | 1273           | 960                      | 209             | 175                 | 1400           |
|               | 1275                       | 258             | 215                 | 1828           | 1920                     | 436             | 339                 | 2691           |
|               | 1700                       | 356             | 272                 | 2411           | 3840                     | 953             | 890                 | 5480           |
|               | 3400                       | 909             | 930                 | 4396           | 7680                     | 2251            | 2463                | 9102           |
|               | 5100                       | 1588            | 1328                | 5892           |                          |                 |                     |                |
|               | 6800                       | 2398            | 2785                | 7917           |                          |                 |                     |                |
| <b>RS39-4</b> | 0                          | 63              | 57                  | 0              | 0                        | 63              | 57                  | 0              |
|               | 723                        | 531             | 431                 | 489            | 960                      | 547             | 376                 | 890            |
|               | 1084                       | 771             | 678                 | 668            | 1920                     | 1114            | 1058                | 1568           |
|               | 1445                       | 961             | 869                 | 959            | 3840                     | 2364            | 1673                | 2604           |
|               | 2168                       | 1421            | 1232                | 1246           | 7680                     | 4855            | 5135                | 5708           |
|               | 2890                       | 2016            | 2019                | 1557           |                          |                 |                     |                |
|               | 4335                       | 3276            | 3105                | 1742           |                          |                 |                     |                |
|               | 5780                       | 4706            | 4596                | 1961           |                          |                 |                     |                |
| <b>RS39-6</b> | 0                          | 102             | 86                  | 0              | 0                        | 102             | 86                  | 0              |
|               | 723                        | 780             | 656                 | 80             | 960                      | 706             | 521                 | 848            |
|               | 1084                       | 791             | 717                 | 717            | 1920                     | 1389            |                     | 1508           |
|               | 1445                       | 982             | 914                 | 889            | 3840                     | 2897            |                     | 2489           |
|               | 2890                       | 2320            | 2339                | 1430           | 7680                     | 4872            | 5023                | 6735           |
|               | 4335                       | 3354            | 3350                | 1786           |                          |                 |                     |                |
|               | 5780                       | 4696            | 5437                | 2371           |                          |                 |                     |                |

Table S5. Equilibrium constants (log K) from MINTEQA2 version 4.0 database for surface complexation modeling of As, P, and carbonate with hydrous ferric oxides (HFO). Log K is same for both weak and strong sites. Surface complexation of Si is not considered because Log K value is not available in MINTEQA2 database.

| Surface complexation reactions                                                                      | Log K  |
|-----------------------------------------------------------------------------------------------------|--------|
| $\text{Hfo\_OH} + \text{H}^+ = \text{Hfo\_OH}_2^+$                                                  | 7.29   |
| $\text{Hfo\_OH} = \text{Hfo\_O}^- + \text{H}^+$                                                     | -8.93  |
| $\text{Hfo\_OH} + \text{H}_3\text{AsO}_3 = \text{Hfo\_H}_2\text{AsO}_3 + \text{H}_2\text{O}$        | 5.41   |
| $\text{Hfo\_OH} + \text{H}_3\text{AsO}_4 = \text{Hfo\_H}_2\text{AsO}_4 + \text{H}_2\text{O}$        | 8.61   |
| $\text{Hfo\_OH} + \text{H}_3\text{AsO}_4 = \text{Hfo\_HAsO}_4^- + \text{H}_2\text{O} + \text{H}^+$  | 2.81   |
| $\text{Hfo\_OH} + \text{H}_3\text{AsO}_4 = \text{Hfo\_OHAsO}_4^{3-} + 3\text{H}^+$                  | -10.12 |
| $\text{Hfo\_OH} + \text{PO}_4^{3-} + 3\text{H}^+ = \text{Hfo\_H}_2\text{PO}_4 + \text{H}_2\text{O}$ | 31.29  |
| $\text{Hfo\_OH} + \text{PO}_4^{3-} + 2\text{H}^+ = \text{Hfo\_HPO}_4^- + \text{H}_2\text{O}$        | 25.39  |
| $\text{Hfo\_OH} + \text{PO}_4^{3-} + \text{H}^+ = \text{Hfo\_PO}_4^- + \text{H}_2\text{O}$          | 17.72  |
| $\text{Hfo\_OH} + \text{CO}_3^{2-} + \text{H}^+ = \text{Hfo\_CO}_3^- + \text{H}_2\text{O}$          | 12.56  |
| $\text{Hfo\_OH} + \text{CO}_3^{2-} + 2\text{H}^+ = \text{Hfo\_HCO}_3^- + \text{H}_2\text{O}$        | 20.62  |

Table S6. Sediment As concentration (mg/kg) and speciation for RS19, 20, and 21 cores determined by 1M P-extraction and XAS; Different aliquots of the same sample were used for P-extraction and XAS.

| Sample No | Latitude    | Longitude   | Depth m     | As speciation |          |           |         |       |                                |
|-----------|-------------|-------------|-------------|---------------|----------|-----------|---------|-------|--------------------------------|
|           |             |             |             | P-extraction  |          |           | XAS     |       |                                |
|           |             |             |             | As(III)       | Total As | As(III) % | As(III) | As(V) | As <sub>2</sub> S <sub>3</sub> |
| RS19-1    | 23° 35.011' | 90° 35.149' | 0.3         | 202           | 284      | 71        | 34±1%   | 66±1% | 0±1%                           |
| RS19-3    |             |             | 0.9         | < 1           | 1        |           | 36±1%   | 64±0% | 0±1%                           |
| RS19-4    |             |             | 1.8         | 556           | 619      | 90        | 73±1%   | 27±0% | 0±1%                           |
| RS19-5    |             |             | 4.6         | 3             | 7        | 52        |         |       |                                |
| RS20-1    |             |             | 23° 35.006' | 90° 35.160'   | 0.3      | < 1       | < 1     |       | 32±2%                          |
| RS20-4    | 1.8         | < 1         |             |               | < 1      |           | 57±1%   | 43±0% | 0±1%                           |
| RS20-7    | 6.1         | 1           |             |               | 1        | 100       | 31±1%   | 69±1% | 0±1%                           |
| RS21-1    | 23° 35.008' | 90° 35.125' | 0.3         | < 1           | < 1      |           | 46±1%   | 54±1% | 0±1%                           |
| RS21-4    |             |             | 1.4         | 5             | 46       | 11        | 9±1%    | 91±1% | 0±1%                           |
| RS21-7    |             |             | 6.7         | < 1           | < 1      |           | 68±1%   | 32±0% | 0±1%                           |



Table S7. Desorption experimental results; Homogenized composite sediment from 1.5 m to 1.8 m depth in RS19-4 was used for desorption experiment. Type I: nanopure water + kanamycin (50 mg/L), Type II: artificial groundwater + kanamycin (50 mg/L), Type III: artificial groundwater, Type IV: artificial groundwater + lactate (1 mM). Initial composition of artificial groundwater and nanopure water is shown, while initial concentrations of P and S in nanopure water are displayed in parenthesis.

| Incubaton<br>Type    | Day       | Supernatant (µg/L) |              |      |      |        |       |         | 1.2N HCl leaching (mg/kg) |     |     |      |        |    |         | 1M P extraction (mg/kg) |         |
|----------------------|-----------|--------------------|--------------|------|------|--------|-------|---------|---------------------------|-----|-----|------|--------|----|---------|-------------------------|---------|
|                      |           | P                  | S            | Mn   | Fe   | Fe(II) | As    | As(III) | P                         | S   | Mn  | Fe   | Fe(II) | As | As(III) | As                      | As(III) |
| <b>Initial Conc.</b> | <b>0</b>  | 620 (< 10)         | 4992 (< 100) | < 1  | < 10 | -      | < 1   | -       | 425                       | 6   | 129 | 6933 | 3433   | 86 | 42      | 91                      | 57      |
| <b>Type I</b>        | <b>2</b>  | 53                 | 4540         | 41   | 1237 | 1202   | 674   | 571     | 417                       | 2.0 | 107 | 5710 | 2453   | 71 | 35      | 88                      | 42      |
|                      | <b>5</b>  | 64                 | 5035         | 42   | 667  | 703    | 677   | 152     | 422                       | 1.9 | 117 | 6435 | 3020   | 69 | 37      | 81                      | 36      |
|                      | <b>10</b> | 136                | 5263         | 62   | 1477 | 1369   | 677   | 21      | 412                       | 0.5 | 105 | 5795 | 2622   | 68 | 33      | 88                      | 20      |
|                      | <b>17</b> | 55                 | 4839         | 49   | 729  | 1236   | 650   | 11      | 366                       | 0.4 | 102 | 5550 | 2524   | 66 | 25      | 78                      | 20      |
|                      | <b>30</b> | 49                 | 5431         | 63   | 485  | 470    | 511   | 3       | 393                       | 0.0 | 101 | 5221 | 2532   | 69 | 21      | 81                      | 15      |
| <b>Type II</b>       | <b>2</b>  | 354                | 60117        | 466  | < 10 | <100   | 565   | 278     | 417                       | 38  | 107 | 5774 | 2711   | 67 | 28      | 88                      | 45      |
|                      | <b>5</b>  | 224                | 51941        | 466  | 36   | <100   | 501   | 23      | 406                       | 31  | 113 | 6329 | 2926   | 72 | 35      | 73                      | 37      |
|                      | <b>10</b> | 300                | 50466        | 438  | 1859 | 1569   | 516   | 23      | 368                       | 43  | 106 | 5832 | 2933   | 71 | 29      | 83                      | 27      |
|                      | <b>17</b> | 181                | 65873        | 323  | 120  | 236    | 468   | 19      | 417                       | 29  | 107 | 5694 | 2598   | 68 | 32      | 89                      | 31      |
|                      | <b>30</b> | 174                | 51998        | 246  | 111  | 137    | 482   | <1      | 407                       | 32  | 103 | 5364 | 2562   | 71 | 38      | 80                      | 32      |
| <b>Type III</b>      | <b>2</b>  | 261                | 53663        | 489  | 18   | <100   | 551   | 358     | 357                       | 40  | 112 | 6183 | 3065   | 70 | 32      | 87                      | 45      |
|                      | <b>5</b>  | 222                | 49255        | 460  | 187  | 336    | 487   | 101     | 421                       | 35  | 114 | 6242 | 2812   | 73 | 30      | 82                      | 38      |
|                      | <b>10</b> | 294                | 53220        | 471  | 1368 | 1102   | 443   | 43      | 357                       | 36  | 111 | 6197 | 3182   | 59 | 40      | 77                      | 34      |
|                      | <b>17</b> | 173                | 50303        | 362  | 231  | 270    | 402   | 14      | 354                       | 36  | 103 | 5533 | 2597   | 68 | 23      | 88                      | 36      |
|                      | <b>30</b> | 122                | 46734        | 305  | 103  | 236    | 378   | <1      | 403                       | 37  | 103 | 5257 | 2640   | 71 | 21      | 79                      | 22      |
| <b>Type IV</b>       | <b>2</b>  | 345                | 54483        | 484  | < 10 | <100   | 624   | 406     | 386                       | 28  | 108 | 5757 | 2652   | 68 | 40      | 85                      | 52      |
|                      | <b>5</b>  | 187                | 49946        | 707  | 482  | 370    | 630   | 359     | 407                       | 37  | 113 | 6373 | 3210   | 73 | 50      | 76                      | 34      |
|                      | <b>10</b> | 533                | 48769        | 1470 | 2957 | 2568   | 3108  | 3609    | 370                       | 33  | 116 | 6108 | 2879   | 73 | 28      | 82                      | 28      |
|                      | <b>17</b> | 387                | 45836        | 1604 | 2818 | 3001   | 7498  | 11377   | 413                       | 26  | 102 | 5998 | 3210   | 36 | 36      | 48                      | 55      |
|                      | <b>30</b> | 708                | 43470        | 1904 | 7671 | 8629   | 12081 | 18681   | 408                       | 24  | 99  | 5572 | 3122   | 23 | 28      | 36                      | 44      |

\*For potential causes for higher Fe(II) and As(III) than total Fe and As, see “Water Analysis” section.

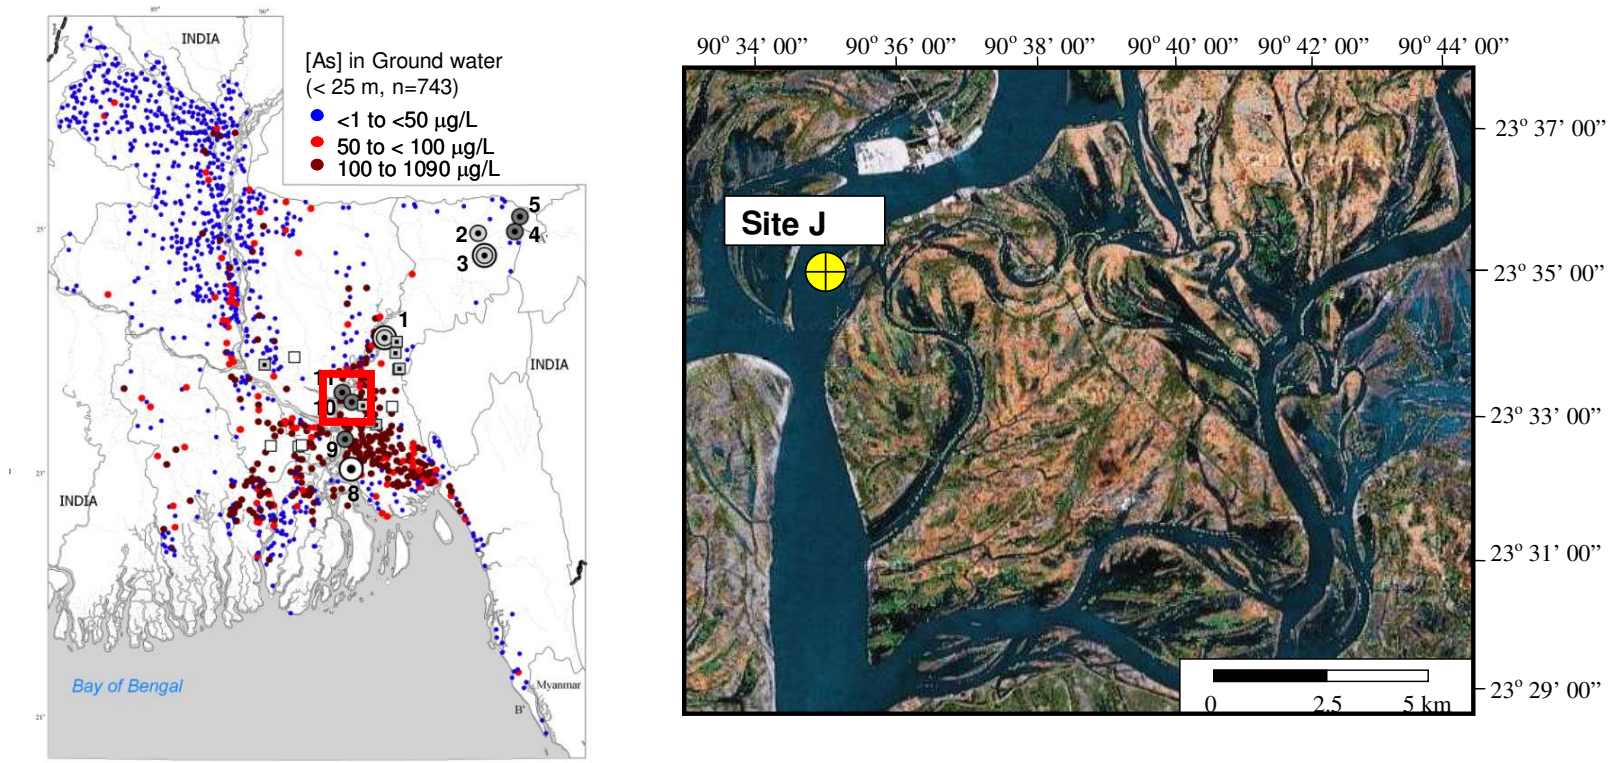

Fig. S1. Left: Map showing sediment and porewater sampling locations (red square) along Meghna Riverbank in Gazaria, Bangladesh, adopted from Datta et al (2009). Right: Sediment core RS19, 20, 21, and 34 were collected from Site J in Jan. 2006, while porewater profiles were collected from Site J in Nov. 2007.

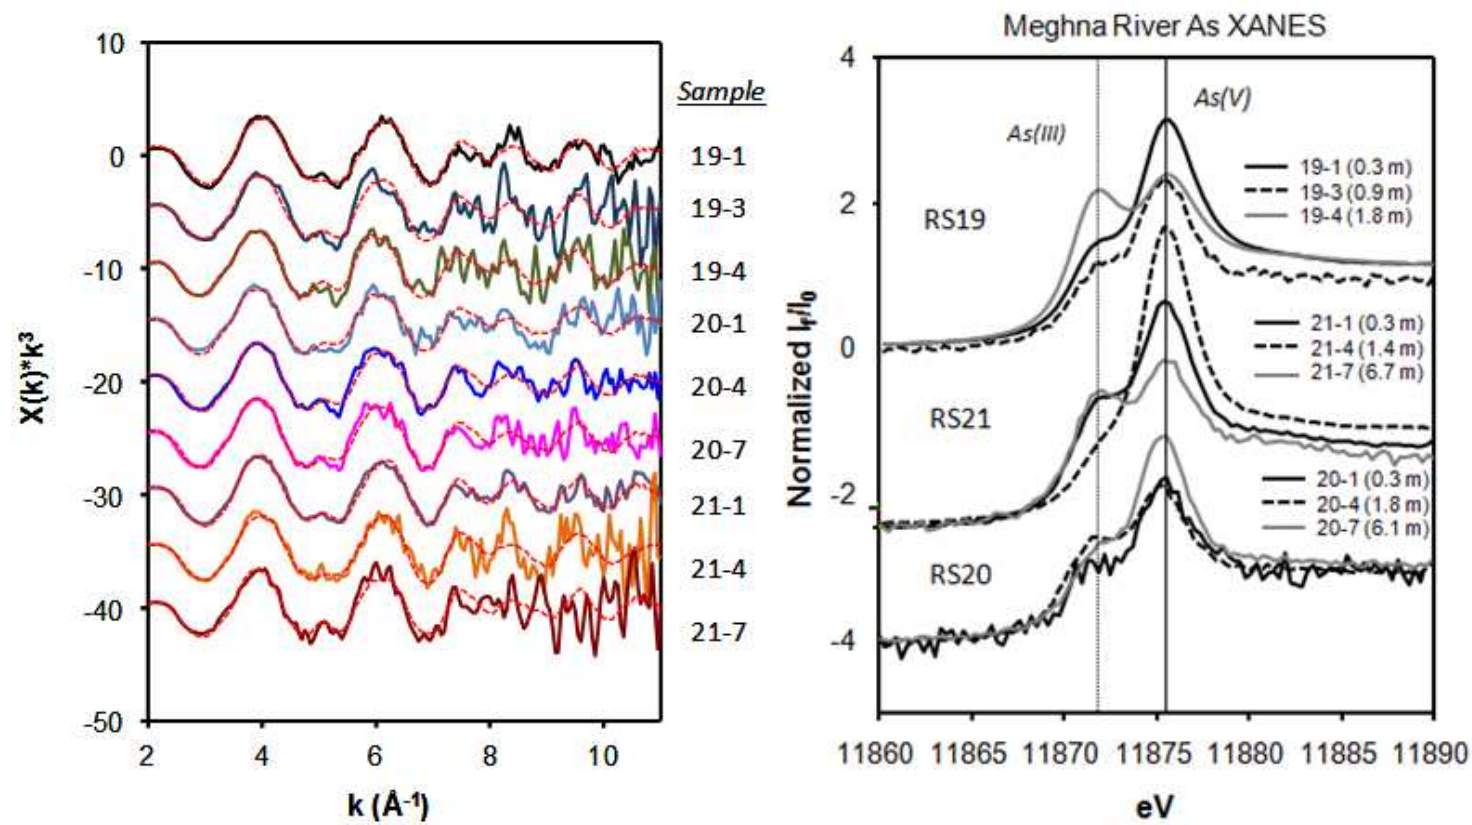

Fig. S2. Fe EXAFS (Left) and As XANES (Right) spectra for RS19, 20, and 21 sediment cores from Site J, collected in Jan. 2006.

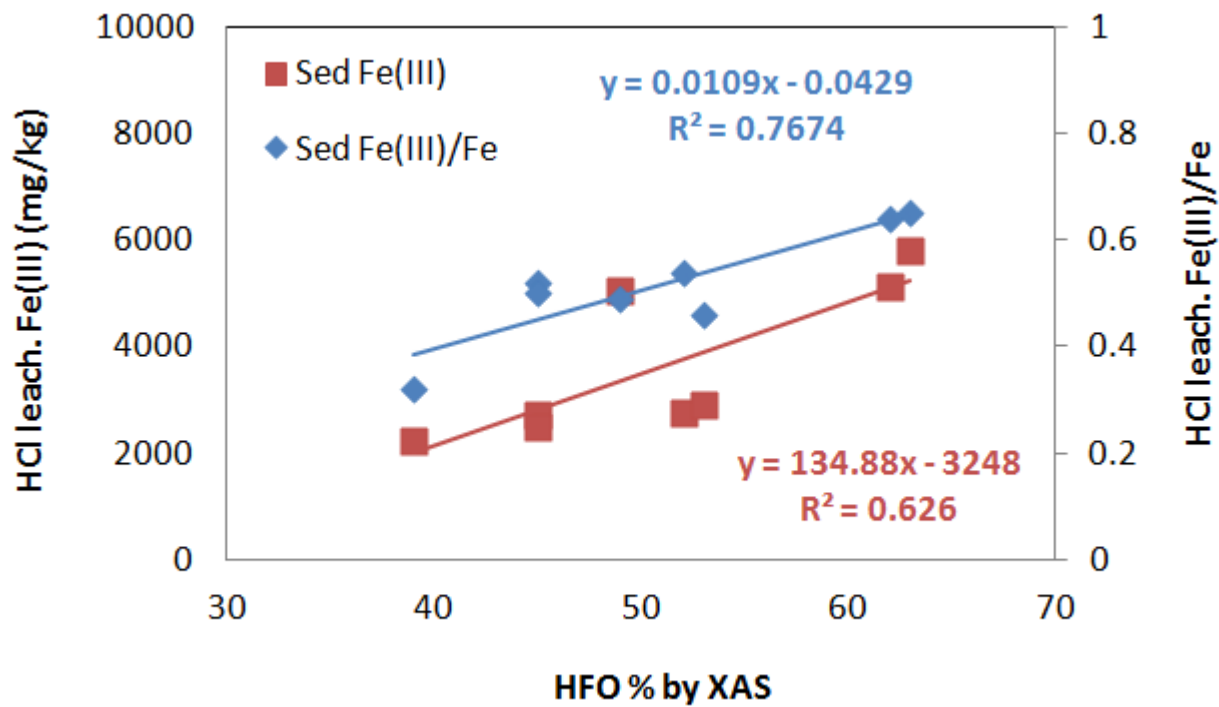

Fig. S3. Correlation between the percentage of hydrous ferric oxide (HFO) including ferrihydrite, goethite, and hematite determined by XAS and HCl leachable Fe(III) (red boxes) or Fe(III)/Fe ratio (blue diamonds).

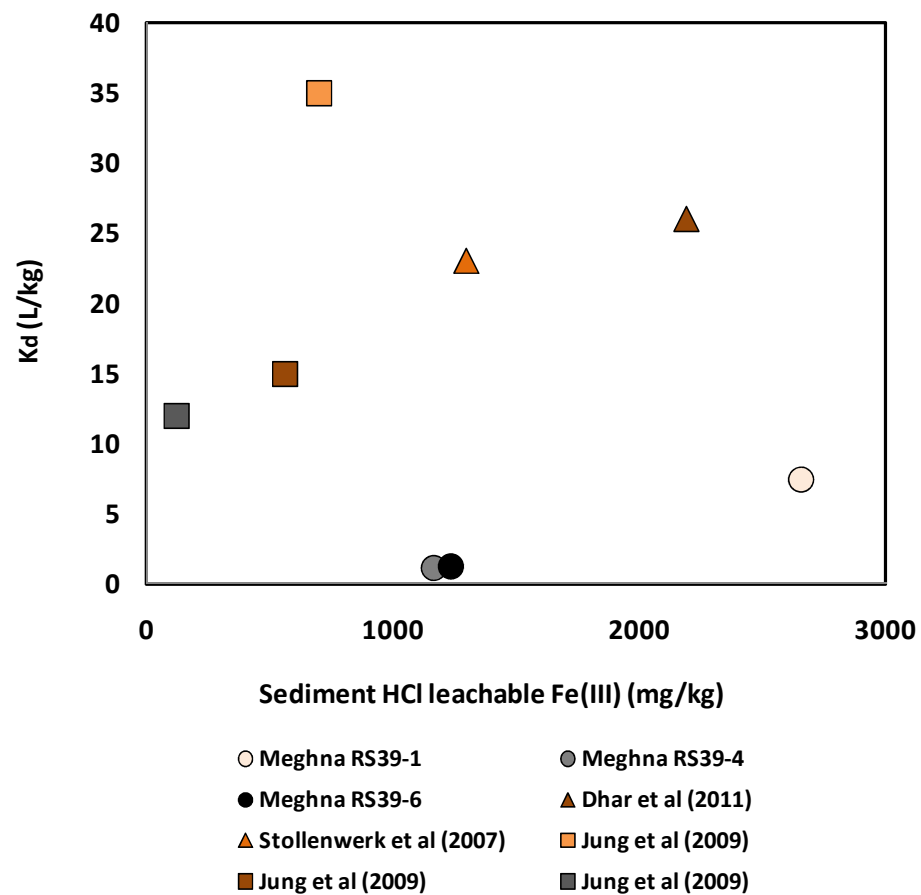

Fig. S4. HCl leachable Fe(III) concentration vs. partitioning coefficient ( $K_d$ ) for As(III); HCl leachable Fe(III) concentration was determined by hot 1.2 N HCl extraction for 1 hr, except for Stollenwerk et al (2007) that used cold 0.5 N HCl extraction for 24 hrs.
